# Supplementary material for: Genome-Wide Identification and Expression Profiling Analysis of SWEET Family Genes Involved in Fruit Development in Plum (Prunus salicina Lindl)
Source: MDPI journal article supplement (doi:10.3390/genes14091679), 2023-08-25
Supplement: s1 [file s1]

Table S1. Primer pairs used in qRT-PCR analysis

| Gene name        | Forward primer            | Reverse primer            |
|------------------|---------------------------|---------------------------|
| <i>PsSWEET1</i>  | TTCTTATGTGGCACTTCATGGTTCA | ATTGATTGCTTTGATTGGTGGG    |
| <i>PsSWEET2</i>  | CAGTGCTCCCTCACAACCTCTTTCA | GCTGTTTCAGTTTTGTTCTCGCTCA |
| <i>PsSWEET3</i>  | GAGGATGCTGGGATTTCTGTTG    | CAACTAAGCAGTCCAACAATCAGC  |
| <i>PsSWEET5</i>  | AGCTCGAAACGTCGTCGGTAT     | ACAAGAAGGCTGTCTGGGTGAA    |
| <i>PsSWEET7</i>  | TGCCGTTGTGGTTTTTCATTACTC  | ACCATTTGGAAGCAGAAGGTAGG   |
| <i>PsSWEET9</i>  | CGGGCTCAAAACGTCAAAAGA     | CGTAGACCACCCAGACAACTCCA   |
| <i>PsSWEET10</i> | CGGATTAAAGTTGTTGGGTGGA    | GATGTTTGGTGCCGCTATGAA     |
| <i>PsSWEET12</i> | TGCCGTTTTCTTTATCCTTCTTCC  | GCTGCTGCTTGTACTTGTATCTCCA |
| <i>PsSWEET13</i> | GTGGCACAGGTCATCCGAACA     | GAGCAGCATCTGAAGCAACCC     |
| <i>PsSWEET14</i> | TAGCTCTTAATGTAGCCTTTCCAGC | TCTTTAGTGCCACCACAGTTTTCA  |
| <i>Actin</i>     | AACTGGGATGACATGGAGAAGATC  | AATGGCATGAGGTAGGGCATAA    |
